# Supplementary material for: A Review of Low-Cost Particulate Matter Sensors from the Developers’ Perspectives
Source: PubMed Central journal article supplement (PMC7730878; doi:10.3390/s20236819), 2020-11-29
Supplement: sensors-20-06819-s001.pdf [file sensors-20-06819-s001.pdf]

**Table S1:** Supporting information for PM sensors Metrological characteristics

The metrological characteristics obtained from the official manufacturers’ websites and freely available technical sheets. The first column refers to the manufacturers’ name, the device model, and the papers and refers to applications based on that sensor model. Column two reports the device’s basic operating mechanism and its main application scenario. Column three reports the device output in  $\mu\text{g}/\text{m}^3$  or  $\text{pcs}/\text{l}$ . Columns four, five, and six report, respectively, the measurement range and its resolution in units corresponding to the device output, as well as the indication error related to the device output. Columns seven and eight are, respectively, the sensor operating temperature range and the RH operating range, respectively. Column nine reports the minimum detectable value of the particle size for each of the sensors discussed. Column ten reports information on device calibration and the way it was performed. In column eleven, the possibility to access raw data is shown.

| Manufacturer/ Model/ Ref                                                  | Type/Main application                                                    | Main measured output data | Measurement range ( $\mu\text{g}/\text{m}^3$ ) | Concentration resolution ( $\mu\text{g}/\text{m}^3$ ) | Working temperature range ( $^{\circ}\text{C}$ ) | Working humidity range ( %RH noncondensing) | Error | Particle diameter resolution or range( $\mu\text{m}$ ) | Manufacturer Calibration [or other laboratory tests]                      | Raw data availability                                              |
|---------------------------------------------------------------------------|--------------------------------------------------------------------------|---------------------------|------------------------------------------------|-------------------------------------------------------|--------------------------------------------------|---------------------------------------------|-------|--------------------------------------------------------|---------------------------------------------------------------------------|--------------------------------------------------------------------|
| Alphasense/ OPC/N2/ [81] [82] [93] [94] [97] [98] [114] [126] [127] [129] | particulate monitor/outdoor                                              | PM1, PM2.5 and PM10       | 1000 (particles/second)                        | 0.01                                                  | -20 to +50                                       | 0-95%                                       | NA    | 0.38 - 17                                              | Method defined by European Standard EN 481/ TSI3330-GRIMM1.108 comparison | 16 bins/1.4 to 10 $\mu\text{m}$ /modifiable particle density value |
| Alphasense/ OPC/N3 [116]                                                  | particulate monitor/indoor/outdoor/recommend in very dusty environments. | PM1, PM2.5, PM10          | 0-2000                                         | 0.01                                                  | -10 to +50                                       | 0-95%                                       | NA    | 0.35-40                                                | TSI OPS 3330; Grimm 1.108 instruments comparison                          | 0.35-40<br>24 bins                                                 |

|                                                                 |                                                                                    |                  |                              |           |            |        |                                      |             |                                                                                                                                                                                                                                                                     |                                                                                                                                                           |
|-----------------------------------------------------------------|------------------------------------------------------------------------------------|------------------|------------------------------|-----------|------------|--------|--------------------------------------|-------------|---------------------------------------------------------------------------------------------------------------------------------------------------------------------------------------------------------------------------------------------------------------------|-----------------------------------------------------------------------------------------------------------------------------------------------------------|
| Alphasense/<br>OPC/R1 [115]                                     | particulate<br>monitor/indoor-<br>outdoor                                          | PM1, PM2.5, PM10 | 10000 (particles/<br>second) | NA        | -10 to +50 | 0-95%  | NA                                   | 0.35 - 12.4 | Comparison<br>of PM2.5/PM10<br>monitoring by<br>OPCR1 sensor and<br>TSI OPS 3330<br>and DustTrak<br>instruments(ambie<br>nt air of a<br>work<br>shop)/calibrated<br>using Polystyrene<br>Spherical Latex<br>Particles (PSLs) of<br>a known diameter<br>and known RI | 0.35 to 12.4;16 bins;<br>allows a different<br>value to be set for<br>each size bin to<br>correct for particle<br>density variation<br>with particle size |
| Amphenol<br>Advanced Sensors/<br>SM-PWM-01C<br>[144]            | dust sensor/indoor                                                                 | PM2.5, PM10      | 0.01-3000                    | noise lim | -10 to +45 | 0-85%  | On calibration<br>graph              | 1           | Cigarette smoke                                                                                                                                                                                                                                                     | 2xPWM scattered<br>signal(PM:1-<br>2µm;PM:3-10µm                                                                                                          |
| Amphenol<br>Advanced Sensors/<br>Telaire SM-PWM-<br>01S [145]   | SMART dust<br>sensor/<br>indoor-outdoor                                            | 1-3µm and 3-10µm | NA                           | NA        | -10 to +45 | 0-85%  | NA                                   | 1 - 20      | cigarette smoke                                                                                                                                                                                                                                                     | Yes-<br>2xPWM scattered<br>signal(PM:1-<br>2µm;PM:3-10µm                                                                                                  |
| Amphenol<br>Advanced Sensors/<br>Telaire SM-UART-<br>01D [151]  | dual channel dust<br>sensor/<br>indoor-outdoor;<br>automotive;harsh<br>environment | NA               | NA                           | NA        | -10 to 70  | 0-95%  | NA                                   | NA          | NA                                                                                                                                                                                                                                                                  | Yes                                                                                                                                                       |
| Amphenol<br>Advanced Sensors/<br>Telaire SM-UART-<br>01L+ [152] | PM2.5 laser dust<br>sensor/-                                                       | PM10             | 1-999                        | 1         | -10 to +50 | 35-85% | 0-100±15µ g/m³;<br>101-999µ g/m³±15% | 0.3         | NA                                                                                                                                                                                                                                                                  | NA                                                                                                                                                        |

|                                                             |                                    |                       |          |    |            |       |                                                                                                                                                                                 |          |                                                                                |                                                                                                                        |
|-------------------------------------------------------------|------------------------------------|-----------------------|----------|----|------------|-------|---------------------------------------------------------------------------------------------------------------------------------------------------------------------------------|----------|--------------------------------------------------------------------------------|------------------------------------------------------------------------------------------------------------------------|
| Amphenol Advanced Sensors/ Telaire SM-UART-04L [145]        | PM2.5-10 particulate dust sensor/- | PM2.5, PM10           | 1-999    | 1  | -10 to +50 | 0-95% | 0-100±10µg/m³;<br>101-999µg/m³±10%                                                                                                                                              | 0.3      | NA                                                                             | NA                                                                                                                     |
| Amphenol Advanced Sensors/ Telaire Telaire DSF Series [170] | / indoor-automotive                | PM2.5                 | 0 to 500 | 1  | -40 to +80 | NA    | 0-100±15µg/m³;<br>100-500µg/m³±15%                                                                                                                                              | NA       | Calibrated KCI                                                                 | Temperature, PM2.5                                                                                                     |
| Bjhike/ HK-A5 [154]                                         | particle sensor/indoor             | PM2.5/10              | 0-999    | NA | -20 to +50 | 0-80% | NA                                                                                                                                                                              | 0.3 - 10 | NA                                                                             | NA                                                                                                                     |
| Cubic Sensor and Instrument Co,Ltd/ PM1003 [146]            | IR LED particle sensor/indoor      | PM2.5                 | 0-500    | NA | -10 to +50 | 0-95% | 0-100±30µg/m³;<br>100-500 µg/m³±30%<br>(25±2°C,<br>50±10%RH)                                                                                                                    | 1.0 - 10 | NA                                                                             | No                                                                                                                     |
| Cubic Sensor and Instrument Co,Ltd/ PM1006K [143]           | LED particle sensor/indoor         | PM1.0, PM2.5,<br>PM10 | 0-1000   | 1  | -20 to +75 | 0-95% | Maximum between<br>±20µg/m³ and<br>±20% (@voltage<br>5.0V, 25±2°C,<br>50±10%RH)                                                                                                 | 0.3 - 10 | TSI-8530, cigarette smoke                                                      | No                                                                                                                     |
| Cubic Sensor and Instrument Co,Ltd/ PM2008 [119]            | laser particle sensor/indoor       | PM1.0, PM2.5,<br>PM10 | 0-5000   | 1  | -10 to +60 | 0-95% | PM1.0&PM2.5: 0-<br>35±10µg/m³<br>>35µg/m³±10%;<br><br>Condition:<br>25±2°C,50±10%RH;<br>PM10: 0 -<br>100±25µg/m³ 101 -<br>1000µg/m³, ±25%<br><br>Condition:<br>25±2°C,50±10%RH, | 0.3 - 10 | Reference instrument:<br>GRIMM<br><br>Dust Source:<br>Cigarette +Arizona<br>A1 | 6 bins particle number; Grimm mass concentration/<br><br>TSI mass concentration/Setu p particle calibrated coefficient |

|                                                      |                              |                        |        |   |            |       |                                                                                                                                                                                                                                              |          |                                                                             |                                                                                                                       |
|------------------------------------------------------|------------------------------|------------------------|--------|---|------------|-------|----------------------------------------------------------------------------------------------------------------------------------------------------------------------------------------------------------------------------------------------|----------|-----------------------------------------------------------------------------|-----------------------------------------------------------------------------------------------------------------------|
| Cubic Sensor and Instrument Co,Ltd/<br>PM2008M [155] | laser particle sensor/indoor | PM1.0, PM2.5,<br>PM10  | 0-1000 | 1 | -10 to +60 | 0-95% | PM1.0&PM2.5: 0 - 35±5µg/m <sup>3</sup> ; 35- 500µg/m <sup>3</sup> ±15%;<br><br>Condition: 25±2°C,50±10%RH;<br>PM10: 0 - 100±30µg/m <sup>3</sup> ; 101 - 500µg/m <sup>3</sup> ±30%;<br><br>Condition: 25±2°C,50±10%RH                         | 0.3 - 10 | Reference instrument:<br>GRIMM<br><br>Dust Source:<br>Cigarette +Arizona A1 | 6 bins particle number; Grimm mass concentration/<br><br>TSI mass concentration/Setup particle calibrated coefficient |
| Cubic Sensor and Instrument Co,Ltd/<br>PM2009 [120]  | laser particle sensor/indoor | PM1.0, PM2.5,<br>PM10  | 0-5000 | 1 | -20 to +60 | 0-95% | PM1.0&PM2.5: 0- 50±5µg/m <sup>3</sup> ; 50- 100±10µg/m <sup>3</sup> ;100- 300µg/m <sup>3</sup> ±15%<br><br>Condition: 25±2°C,50±10%RH;<br>PM10:0- 100±25µg/m <sup>3</sup> ; 100- 300µg/m <sup>3</sup> ±25%<br><br>Condition: 25±2°C,50±10%RH | 0.3 - 10 | Reference instrument:<br>GRIMM<br><br>Dust Source:<br>Cigarette +Arizona A1 | 6 bins particle number; Grimm mass concentration/<br><br>TSI mass concentration/Setup particle calibrated coefficient |
| Cubic Sensor and Instrument Co,Ltd/<br>PM2012 [158]  | Laser Particle sensor/indoor | PM1.0<br>PM2.5<br>PM10 | 0-5000 | 1 | 10 to +60  | 0-95% | PM2.5/PM1.0:<br>0-100±10µg/m <sup>3</sup> ; 101-500µg/m <sup>3</sup> ±10%<br><br>PM10:<br>0-100±25µg/m <sup>3</sup> ; 101-500µg/m <sup>3</sup> ±25%<br><br>(GRIMM, 25±2°C, 50 ±10%RH )                                                       | 0.3 - 10 | (GRIMM, 25±2°C, 50 ±10%RH )                                                 | 6 bins particle number; Grimm mass concentration/<br><br>TSI mass concentration/Setup Particle Calibrated Coefficient |

|                                                      |                                              |                       |        |    |            |       |                                                                                                                                                                                                                                                        |          |                                                               |                                                                                                                          |
|------------------------------------------------------|----------------------------------------------|-----------------------|--------|----|------------|-------|--------------------------------------------------------------------------------------------------------------------------------------------------------------------------------------------------------------------------------------------------------|----------|---------------------------------------------------------------|--------------------------------------------------------------------------------------------------------------------------|
| Cubic Sensor and Instrument Co,Ltd/<br>PM2105M [157] | laser particle sensor/indoor                 | PM1.0, PM2.5,<br>PM10 | 0-1000 | 1  | -10 to +60 | 0-95% | PM1.0&PM2.5: 0 - 35±5µg/m <sup>3</sup> ; >35µg/m <sup>3</sup> ±15%<br><br>Condition: 25±2°C, 50±10%RH; PM10: 0 -100±30µg/m <sup>3</sup> ; 101 - 1000µg/m <sup>3</sup> ±30%<br><br>Condition: 25±2°C, 50±10%RH,                                         | 0.3 - 10 | Reference instrument: GRIMM/TSI<br><br>Dust source: Cigarette | 6 bins<br>Particle number;Grimm mass concentration/<br><br>TSI mass concentration/Set up particle calibrated coefficient |
| Cubic Sensor and Instrument Co,Ltd/<br>PM2107 [156]  | laser Particle sensor/indoor                 | PM2.5                 | 0-1000 | 1  | -10 to +50 | 0-95% | 0-35±5µg/m <sup>3</sup> ; >35µg/m <sup>3</sup> ±15%<br><br>Condition: 25±2°C, 50±10%RH,                                                                                                                                                                | 0.3 - 10 | Reference instrument: TSI8530<br><br>Dust Source: Cigarette   | No                                                                                                                       |
| Cubic Sensor and Instrument Co,Ltd/<br>PM3006T [160] | outdoor laser particle sensor module/outdoor | PM1.0, PM2.5,<br>PM10 | 0-1000 | NA | -30 to +70 | 0-95% | PM1.0/PM2.5: <35 ±5µg/m <sup>3</sup> ;<br>35-100±10µg/m <sup>3</sup><br>100- 1000µg/m <sup>3</sup> ±10%<br><br>Condition: 25±2°C,50±10%RH;<br>PM10: ≤100±15µg/m <sup>3</sup><br><br>100- 1000µg/m <sup>3</sup> ±15%<br><br>Condition: 25±2°C,50±10%RH, | 0.3 - 10 | Reference instrument: GRIMM                                   | Setup particle calibrated coefficient of PM1.0, PM2.5, and PM10                                                          |

|                                                  |                                                    |                                                             |                                                   |           |            |        |                                                                                                                       |          |                               |                                                             |
|--------------------------------------------------|----------------------------------------------------|-------------------------------------------------------------|---------------------------------------------------|-----------|------------|--------|-----------------------------------------------------------------------------------------------------------------------|----------|-------------------------------|-------------------------------------------------------------|
| Cubic Sensor and Instrument Co,Ltd/ PM3015 [159] | laser particle sensor/ indoor, outdoor             | PM1.0, PM2.5, PM10                                          | 0 - 500                                           | 1         | -25 to +60 | 0-95%  | PM1.0&PM2.5: ≤ 100 ±10µg/m³<br>>100µg/m³ ±10%<br><br>(Reference instrument: GRIMM<br><br>Conditions: 25±2°C,50±10%RH) | NA       | NA                            | Yes                                                         |
| Cubic Sensor and Instrument Co,Ltd/ PM5000 [161] | laser particle count sensor module/indoor,out door | 6bins(number pcs/L):0.3µm, 0.5µm, 1.0µm, 2.5µm, 5.0µm, 10µm | 0-10000000 (particles/l)                          | 1 (pcs/l) | -30 - +70  | 0-95%  | ≤100±30pcs/L<br>> 100pcs/L±30%<br><br>Condition: 25±2°C,50±10%RH                                                      | 0.3 - 10 | Reference instrument: TSI9306 | 6 bins(number pcs/L):0.3µm, 0.5µm, 1.0µm,2.5µm, 5.0µm, 10µm |
| EcologicSense/ NEXT-PM [117]                     | particulate matter OEM sensor/indoor/outdoor       | PM1 - PM2,5 - PM10                                          | 0 - 1000                                          | NA        | -20 to +70 | 0-95%  | Linearity error <5 %<br><br>Repeatability error <3 %                                                                  | 0.3 - 10 | NA                            | Yes                                                         |
| Elitech/ PM-900M [171]                           | particle sensor/ indoor-automotive                 | PM1.0, PM2.5, PM10                                          | effective (PM2.5): 0-500                          | 1         | -10 to +60 | NA     | 0-100±10µg/m³;100-500 µg/m³±10%                                                                                       | 0.3      | NA                            | Yes                                                         |
| Grove Studio/ Laser PM2.5 Sensor (HM3301) [162]  | /indoor                                            | PM2.2, PM10, TSP                                            | 1-500 (effective range)<br>1-1000 (maximum range) | 1         | -10 to +60 | 10-90% | 100-500µ g/m³±10%<br>0-100±10µ g/m³                                                                                   | 0.3      | NA                            | NA                                                          |

|                                                           |                                                                     |                                 |          |     |            |        |                                                                                                       |        |    |                                 |
|-----------------------------------------------------------|---------------------------------------------------------------------|---------------------------------|----------|-----|------------|--------|-------------------------------------------------------------------------------------------------------|--------|----|---------------------------------|
| Honeywell/<br>HPMA115C0-003<br>[122]                      | laser-based light scattering particle sensing/indoor - automotive   | PM1.0,<br>PM2.5, PM4.0,<br>PM10 | 0-1000   | 1   | -20 to +70 | 0-95%  | PM2.5: 0-100±15µg/m³; 100-1000µg/m³±15 %;<br>PM1.0, PM4.0,<br>PM10: 0-100±25µg/m³; 100-1000µg/m³±25%; | NA     | NA | Customer adjustment coefficient |
| Honeywell/<br>HPMA115C0-004<br>[122]                      | laser-based light scattering particle sensing/indoor                | PM1.0,<br>PM2.5, PM4.0,<br>PM10 | 0-1000   | 1   | -20 to +70 | 0-95 % | PM2.5: 0-100±15µg/m³; 100-1000µg/m³±15 %;<br>PM1.0, PM4.0,<br>PM10: 0-100±25µg/m³; 100-1000µg/m³±25%; | NA     | NA | Customer Adjustment Coefficient |
| Honeywell/<br>HPMA115S0-XXX/<br>[67] [122] [129]<br>[130] | laser-based light scattering particle sensing/<br>indoor-automotive | PM2.5 PM10                      | 0-1000   | 1   | -20 to +50 | 0-95%  | PM2.5: 0 - 100 ±15 µg/m³<br>PM2.5: 100 - 1000 µg/m³ ±15 %                                             | NA     | NA | Customer adjustment coefficient |
| Inovafitness/<br>SDS011/ [57] [67]<br>[82] [113]          | laser based<br>PM2.5;10<br>sensor/indoor                            | PM2.5,PM10                      | 0-1000   | 0.3 | -10 to +50 | 0-70%  | Maximum between ±15% and ±10µg/m³                                                                     | 0.3-10 | NA | No                              |
| Inovafitness/<br>SDS018 [164]                             | laser based<br>PM2.5;10<br>sensor/indoor                            | PM2.5,PM10                      | 0-1000   | 0.3 | -10 to +50 | 0-70%  | Maximum between ±15% and ±10µg/m³                                                                     | 0.3-10 | NA | No                              |
| NanoSense/<br>PM2036 [163]                                | particle sensor/<br>indoor-outdoor                                  | PM2.5, PM10                     | 0 - 1000 | NA  | -20 to +50 | 0-95%  | < 50 ± 10µg/m³<br>50-100± 15µg/m³<br>> 100µg/m³ ± 15%                                                 | 0.3    | NA | Yes                             |

|                                                |                                                  |                                                |          |    |            |       |                                                                |     |                                                                                                                                                                                                                                                       |                                                                                                    |
|------------------------------------------------|--------------------------------------------------|------------------------------------------------|----------|----|------------|-------|----------------------------------------------------------------|-----|-------------------------------------------------------------------------------------------------------------------------------------------------------------------------------------------------------------------------------------------------------|----------------------------------------------------------------------------------------------------|
| Panasonic/ LED Type PM2.5 Sensor [147]         | particle sensor/indoor                           | PM 2.5                                         | 0-300    | NA | NA         | NA    | NA                                                             | 0.5 | NA                                                                                                                                                                                                                                                    | Yes                                                                                                |
| Panasonic/ SN-GCJA5 Laser Type PM Sensor [165] | particle sensor/indoor                           | PM2.5, PM10 & PM1, cigarette smoke, house dust | 0 – 2000 | NA | -10 to +60 | 0-95% | ±10%                                                           | 0.3 | Particle generator<br>Cigarette smoke suction machine<br>(complies with JEM1467)<br>Customized particle generator<br>Dust meter DUSTTRAK II Aerosol Monitor 8530<br>(with PM2.5 impactor)<br>DUSTTRAK II Aerosol Monitor 8530<br>(with PM10 impactor) | Yes                                                                                                |
| Plantower/ PMS 1003/ [80] [131]                | laser based particle concentration sensor/indoor | PM 1, PM2.5, PM10                              | 0-500    | 1  | -10 to +60 | 0-99% | 100-500 µg/m <sup>3</sup> ±10%<br>0-100 ± 10 µg/m <sup>3</sup> | 0.3 | Standard Particles/<br>atmospheric environment                                                                                                                                                                                                        | 6 bins particle number; standard particles concentration/<br>atmospheric environment concentration |



|                                                 |                                                  |                         |                                   |    |            |        |                                                                                                                                                                                                                     |     |                                                                                                                                                      |                                                                                                    |
|-------------------------------------------------|--------------------------------------------------|-------------------------|-----------------------------------|----|------------|--------|---------------------------------------------------------------------------------------------------------------------------------------------------------------------------------------------------------------------|-----|------------------------------------------------------------------------------------------------------------------------------------------------------|----------------------------------------------------------------------------------------------------|
| Plantower/ PMS 7003/ [55] [81] [82] [124] [129] | laser based particle concentration sensor/indoor | PM 1, PM2.5, PM10       | 0-500                             | 1  | -10 to +60 | 0-99%  | 100-500 $\mu\text{g}/\text{m}^3 \pm 10\%$<br>0-100 $\pm 10 \mu\text{g}/\text{m}^3$                                                                                                                                  | 0.3 | Standard Particles/<br>atmospheric environment                                                                                                       | 6 bins particle number; standard particles concentration/<br>atmospheric environment concentration |
| Plantower/ PMS A003/ [76] [125]                 | laser based particle concentration sensor/indoor | PM 1, PM2.5, PM10       | 0-500                             | 1  | -10 to +60 | 0-99%  | 100-500 $\mu\text{g}/\text{m}^3 \pm 10\%$<br>0-100 $\pm 10 \mu\text{g}/\text{m}^3$                                                                                                                                  | 0.3 | Standard Particles/<br>atmospheric environment                                                                                                       | 6 bins particle number; standard particles concentration/<br>atmospheric environment concentration |
| SAMYOUNG S&C/ PSML [148]                        | PM 2.5 sensor/<br>indoor-outdoor                 | PM2.5/PM1.0             | 0-500 (effective) 0-900 (maximum) | NA | -10 to +65 | 0-95%  | 100-500 $\mu\text{g}/\text{m}^3 \pm 25\%$<br>; 0-100 $\pm 25\mu\text{g}/\text{m}^3$                                                                                                                                 | 0.3 | Particle Source :<br>Cigarette<br><br>Reference Instrument :<br>GRIMM 11-A                                                                           | NA                                                                                                 |
| SAMYOUNG S&C/ PSMU [148]                        | PM 2.5 sensor/<br>indoor-outdoor                 | PM2.5/PM1.0             | 0-500 (effective) 0-900 (maximum) | NA | -10 to +65 | 0-95%  | 100-500 $\mu\text{g}/\text{m}^3 \pm 25\%$<br>; 0-100 $\pm 25\mu\text{g}/\text{m}^3$                                                                                                                                 | 0.3 | Particle Source :<br>Cigarette<br><br>Reference Instrument :<br>GRIMM 11-A                                                                           | NA                                                                                                 |
| Sensirion/ SPS30/ [118] [132]                   | particulate matter sensor/<br>indoor-outdoor     | PM1.0, PM2.5, PM4, PM10 | 0-1000                            | 1  | 10 to +40  | 20-80% | PM1, PM2.5:<br>0 - 100 $\pm 10 \mu\text{g}/\text{m}^3$<br>100 - 1000 $\mu\text{g}/\text{m}^3 \pm 10\%$<br><br>PM4, PM10:<br>0 - 100 $\pm 25 \mu\text{g}/\text{m}^3$<br>100 - 1000 $\mu\text{g}/\text{m}^3 \pm 25\%$ | 0.3 | PM2.5 mass concentration<br>Calibrated to TSI DustTrak™<br><br>DRX 8533 Ambient Mode<br><br>PM2.5 number concentration<br>Calibrated to TSI OPS 3330 | 5 bins particle number                                                                             |

|                                                                     |                                           |                 |                               |           |            |        |    |     |                                                                                                                                                                                                                 |                                                                         |
|---------------------------------------------------------------------|-------------------------------------------|-----------------|-------------------------------|-----------|------------|--------|----|-----|-----------------------------------------------------------------------------------------------------------------------------------------------------------------------------------------------------------------|-------------------------------------------------------------------------|
| Sharp/<br>DN7C3CA007<br>[166]                                       | dust sensor with<br>particle separator /- | PM2.5           | 25-500                        | noise lim | -10 to +60 | 10-90% | NA | NA  | Hipresica(siO2)2.5<br>um<br>-                                                                                                                                                                                   | 12..13 18..20<br>number<br>concentration<br>PM2.5 [# /cm <sup>3</sup> ] |
| Sharp/<br>GP2Y1010AU0F/<br>[63] [65] [67] [83]<br>[134] [135] [136] | LED based dust<br>sensor/indoor           | PM10            | 0-500                         | noise lim | -10 to +65 | NA     | NA | NA  | Cigarette smoke<br>reference : dust<br>monitor (P-5L2:<br>manufactured by<br>SHIBATA<br>SCIENTIFIC<br>TECHNOLOGY<br>LTD)                                                                                        | 10..11 15..17<br>number<br>concentration<br>PM1.0 [# /cm <sup>3</sup> ] |
| Shinyei/ PMS1/ [98]<br>[128]                                        | particulate sensor/-                      | PM 2.5          | 0 - 200                       | NA        | -10 to +45 | 20-85% | NA | 0.3 | NA                                                                                                                                                                                                              | NA                                                                      |
| Shinyei/ PPD20V/<br>[138] [139]                                     | /indoor                                   | PM10(pcs/litre) | 0-30000<br>(particles/liter)  | NA        | 0 to +40   | 0-95%  | NA | 1   | Cigarette smoke,<br>concentration<br>reference:Rion<br>Kc01/<br><br>Drop test,<br>Vibration, high<br>temperature and<br>humidity<br>endurance                                                                   | Yes                                                                     |
| Shinyei/ PPD42NJ/<br>[63] [138] [140]                               | particle sensor<br>unit/indoor            | PM2.5, PM10     | 0 - 8000<br>(particles/283ml) | NA        | 0 to +45   | 0-95%  | NA | 1   | Cigarette smoke,<br>weight<br>concentration<br>reference: sibata<br>LD5reference,<br>concentration<br>reference:Rion<br>Kc01/<br><br>Drop test,<br>Vibration, high<br>temperature and<br>humidity<br>endurance, | 16..17 24..26<br>number<br>concentration<br>PM10 [# /cm <sup>3</sup> ]  |

|                                           |                                           |                                                                                      |                                                     |    |             |       |                                               |     |                                                                                                                      |                                                                |
|-------------------------------------------|-------------------------------------------|--------------------------------------------------------------------------------------|-----------------------------------------------------|----|-------------|-------|-----------------------------------------------|-----|----------------------------------------------------------------------------------------------------------------------|----------------------------------------------------------------|
| Shinyei/ PPD60PV-T2/ [138] [141]          | particulate sensor/indoor                 | PM10(pcs/litre) detects air borne particles from cleanliness class 100000 to 1000000 | 0 to 20000 (particles/283ml) (0.5um range particle) | NA | 0 to +45    | 0-95% | NA                                            | 0.5 | Cigarette smoke, concentration reference:Rion Kc01/<br>Drop test, Vibration, high temperature and humidity endurance | Yes                                                            |
| Shinyei/ PPD71 [149]                      | /indoor                                   | NA                                                                                   | 0- 500                                              | NA | -10 to +60  | 0-95% | NA                                            | 0.5 | Cigarette smoke                                                                                                      | 14..15 21..23 number concentration PM4.0 [# /cm <sup>3</sup> ] |
| TianjinFigaro-isweek/ TF-LP01 [167]       | laser particulate matter sensor/indoor    | PM1.0 ,PM2.5 ,PM10                                                                   | 0-999                                               | 1  | -10 to +50  | 0-95% | NA                                            | NA  | NA                                                                                                                   | Yes                                                            |
| Winsen/ ZH03/ZH03A/ZH03B/ [67] [82] [142] | particles sensor PM2.5 dust sensor/indoor | PM1.0, PM2.5, PM10                                                                   | PM2.5: 0-1000                                       | NA | -10 to +50  | 0-85% | NA                                            | 0.3 | NA                                                                                                                   | NA                                                             |
| Winsen/ ZH06- I [168]                     | laser dust sensor/indoor-                 | PM1.0. PM2.5. PM10                                                                   | NA                                                  | NA | - 10 to +60 | 0-80% | NA                                            | 0.3 | NA                                                                                                                   | NA                                                             |
| Winsen/ ZPH01 [150]                       | particles sensor/indoor-                  | PM2.5                                                                                | 15000 (particles/283ml)                             | NA | 0 to +50    | 0-90% | NA                                            | 1   | NA                                                                                                                   | NA                                                             |
| YAGUCHI ELECTRIC CORP./ SDS021 [169]      | particle sensor/indoor-outdoor            | PM1, PM2.5, PM10                                                                     | 0-1000                                              | NA | -20 to +60  | 0-70% | Maximum between ±15% and ±10µg/m <sup>3</sup> | 0.3 | NA                                                                                                                   | Yes                                                            |

**Table S2 :** Supporting information for Technical characteristics

The first column reports, together with the manufacturers' name, the device model and the numbers related to the papers that discuss applications based on that sensor model. Column 2 refers to the LCPMS dimension and weight. Column 3 is related to the power supply required by the device and indicates the power input required to properly supply

the sensor. In column 4, the maximum absorption of current during normal device operations is reported. In column five, the current in mA consumed by the sensor when in sleep mode (if applicable) is shown. Column 6 reports the ability to regulate the power of the laser source, providing a chance for the designer to regulate the power consumption of the entire system. Column 7 reports the “Response/warm up time” for the various devices listed. This parameter indicates the minimum time required by the sensor to give a response after a query. Column 8 reports information related to the “Output interface (Bus type)/Level”. Column 9 reports the “Flow type/inlet-outlet position” parameter, which indicates how sampled air is able to enter into the detection chamber. Column 10, “Lifetime/ageing phenomena”, reports data related to the device’s lifetime reliability to provide information related to system maintenance. The last column, “Approximate Cost range”, shows the price range (synthetic parameter) at the time of this review (approximately low $\leq$ 15 EUR; 15 EUR<mid<60EUR ; high $\geq$ 60 EUR) to outline, along with the other parameters, the quality / price ratio of each sensor.

| Manufacturer/ Model/ Ref                                                  | Dimension (mm) and weight (g) | Power supply (V) | Working current (mA) | Sleep current (mA)/Low power operating modalities | Laser power regulation | Response/Warm up time (sec) | Output interfaces/Level | Flux type/Inlet-outlet position    | Lifetime/Ageing phenomena | Approximate cost range |
|---------------------------------------------------------------------------|-------------------------------|------------------|----------------------|---------------------------------------------------|------------------------|-----------------------------|-------------------------|------------------------------------|---------------------------|------------------------|
| Alphasense/ OPC/N2/ [81] [82] [93] [94] [97] [98] [114] [126] [127] [129] | 64x75x60/105                  | 4.8 to 5.2       | 175                  | 95mA/laser at minimum power; fan off              | Yes                    | 1.4/10                      | SPI/-                   | FAN/opposite sides                 | NA                        | High                   |
| Alphasense/ OPC/N3 [116]                                                  | 75x63.5x60/105                | 4.8 to 5.2       | 180                  | <45mA                                             | Yes                    | 1-30/-                      | SPI/-                   | FAN/opposite sides                 | NA                        | NA                     |
| Alphasense/ OPC/R1 [115]                                                  | 72x21.5x25.5                  | 4.8 to 5.2       | 95                   | <5mA                                              | Yes                    | 1-30/-                      | SPI/-                   | FAN/different side                 | NA                        | High                   |
| Amphenol Advanced Sensors/ SM-PWM-01C [144]                               | 59x46x18/20                   | 5                | 90                   | NO                                                | No                     | 5-30/120                    | 2x PWM/3.3V             | Hot air (forced natural)/same side | NA                        | Low                    |

|                                                                      |                |         |     |        |    |       |            |                                                            |     |     |
|----------------------------------------------------------------------|----------------|---------|-----|--------|----|-------|------------|------------------------------------------------------------|-----|-----|
| Amphenol<br>Advanced Sensors/<br>Telaire SM-PWM-<br>01S [145]        | 46x34x17.6/10  | 5       | 60  | NA     | No | NA    | PWM,UART/- | Auto suction by a<br>built-in heater<br>resistor           | NA  | Low |
| Amphenol<br>Advanced Sensors/<br>Telaire SM-UART-<br>01D [151]       | x-x-x/-        | 12      | 80  | NA     | No | -/30  | UART/-     | FAN                                                        | NA  | Mid |
| Amphenol<br>Advanced Sensors/<br>Telaire SM-UART-<br>01L+ [152]      | 43x45x18/-     | 5       | 100 | NA     | NA | 15/-  | UART/-     | FAN                                                        | NA  | Mid |
| Amphenol<br>Advanced Sensors/<br>Telaire SM-UART-<br>04L [145]       | 48x12x37       | 5       | 100 | NA     | NA | 5/-   | UART/-     | FAN                                                        | NA  | Mid |
| Amphenol<br>Advanced Sensors/<br>Telaire Telaire DSF<br>Series [170] | 78x51x33/-     | 9 to 16 | NA  | NA     | No | 15/60 | LIN/-      | NA                                                         | NA  | NA  |
| Bjhike/ HK-A5<br>[154]                                               | 46x35x20<br>/- | 5       | 120 | <200μA | NA | 10/-  | UART/-     | FAN                                                        | >5y | Mid |
| Cubic Sensor and<br>Instrument Co,Ltd/<br>PM1003 [146]               | 59x45x17.2/26  | 5       | 90  | NA     | No | 30/-  | PWM,UART/- | Auto suction by a<br>built-in heater<br>resistor/same side | NA  | NA  |

|                                                   |                   |   |     |                                   |    |     |                                    |                                                  |                                      |     |
|---------------------------------------------------|-------------------|---|-----|-----------------------------------|----|-----|------------------------------------|--------------------------------------------------|--------------------------------------|-----|
| Cubic Sensor and Instrument Co,Ltd/ PM1006K [143] | 46.2x34.1x18/17.4 | 5 | 30  | NA                                | No | 8/- | UART, PWM/4.5V                     | NO FAN/opposite side                             | MTTF: 5y                             | NA  |
| Cubic Sensor and Instrument Co,Ltd/ PM2008 [119]  | 48x40x12/-        | 5 | 100 | ≤200μA/low power acquisition mode | No | 1/8 | UART,PWM, I2C/3.3V,5V              | FAN/same side                                    | MTTF: 37297 hrs (continuous turn on) | Mid |
| Cubic Sensor and Instrument Co,Ltd/ PM2008M [155] | 48x40x12/-        | 5 | 100 | ≤200μA/low power acquisition mode | No | 1/8 | UART,PWM, I2C/3.3V,5V              | FAN/same side                                    | MTTF: 37297 hrs (continuous turn on) | Mid |
| Cubic Sensor and Instrument Co,Ltd/ PM2009 [120]  | 50x38x21/-        | 5 | 100 | < 20mA/low power acquisition mode | No | 1/8 | UART, I2C/3.3V,5V                  | FAN/same side                                    | MTTF: 37297 hrs (continuous turn on) | Mid |
| Cubic Sensor and Instrument Co,Ltd/ PM2012 [158]  | 38x35x12/-        | 5 | 100 | ≤200μA/low power acquisition mode | No | 1/8 | UART,I2C/ 3.3V,5V)                 | FAN/Two Type:<br>Same side/<br>opposite<br>sides | MTTF 110000 hrs (continuous turn on) | Mid |
| Cubic Sensor and Instrument Co,Ltd/ PM2105M [157] | 42x35x23.7/-      | 5 | 100 | < 20mA/low power acquisition mode | No | 1/8 | UART, PWM I <sup>2</sup> C/3.3V,5V | FAN/opposite side                                | MTTF 37297 hrs (continuous turn on)  | Mid |
| Cubic Sensor and Instrument Co,Ltd/ PM2107 [156]  | 58.7x45x13.9/-    | 5 | 100 | < 20mA/Low Power Acquisition Mode | No | 1/8 | UART, PWM I <sup>2</sup> C/3.3V,5V | FAN/same side                                    | MTTF: 16910 hrs (continuous turn on) | Mid |

|                                                   |                 |   |     |                                  |    |      |                          |                    |                                              |     |
|---------------------------------------------------|-----------------|---|-----|----------------------------------|----|------|--------------------------|--------------------|----------------------------------------------|-----|
| Cubic Sensor and Instrument Co,Ltd/ PM3006T [160] | 85x74x24.9/-    | 5 | 250 | <20mA/low power acquisition mode | No | 1/8  | UART,I2C/3.3V,5V )       | FAN/opposite sides | Life span > 3 y/laser diode MTTF>88000 hours | NA  |
| Cubic Sensor and Instrument Co,Ltd/ PM3015 [159]  | 42x35x23.7/-    | 5 | 100 | <20mA                            | No | 1/8  | UART,I2C/3.3V,5V         | FAN                | 37297hr (continuous turn on)                 | NA  |
| Cubic Sensor and Instrument Co,Ltd/ PM5000 [161]  | 85x74x24.9/-    | 5 | 250 | <20mA                            | No | 1/8  | UART_TTL/I2C ( 3.3V/5V ) | FAN/opposite sides | Life span ≥3y                                | NA  |
| EcologicSense/ NEXT-PM [117]                      | 62x52x23/-      | 5 | 250 | 1mA                              | No | NA   | UART,MODBUS/-            | FAN                | (MTTF) : 10 000 hrs                          | NA  |
| Elitech/ PM-900M [171]                            | NA              | 5 | 100 | NA                               | No | NA   | NA                       | FAN                | MTTF 110000 hrs (continuous turn on)         | Mid |
| Grove Studio/ Laser PM2.5 Sensor (HM3301) [162]   | 40x38x15/-      | 5 | 75  | 150µA                            | NA | -/30 | UART,I2C /3.3V           | FAN/different Side | 2y min (indoor)                              | Mid |
| Honeywell/ HPMA115C0-003 [122]                    | 44x36x12/-      | 5 | 80  | 20mA                             | No | 6/-  | UART/-                   | FAN                | 10y                                          | Mid |
| Honeywell/ HPMA115C0-004 [122]                    | 44x36x12/-      | 5 | 80  | 20mA                             | No | 6/-  | UART/-                   | FAN                | 10y                                          | Mid |
| Honeywell/ HPMA115S0-XXX/                         | 43x36,00x23,7/- | 5 | 80  | 20mA                             | No | 6/-  | UART/-                   | FAN                | 10y                                          | Mid |

|                                                              |                  |            |     |                                                                 |             |        |               |                   |                                   |     |
|--------------------------------------------------------------|------------------|------------|-----|-----------------------------------------------------------------|-------------|--------|---------------|-------------------|-----------------------------------|-----|
| [67] [122] [129]<br>[130]                                    |                  |            |     |                                                                 |             |        |               |                   |                                   |     |
| Inovafitness/<br>SDS011/ [57] [67]<br>[82] [113]             | 71x70x23/100     | 4.7 to 5.3 | 70  | 4mA/laser<br>and fan<br>sleep/low<br>power<br>operating<br>mode | Laser sleep | 1/10   | UART,PWM/3.3V | FAN/opposite side | service life is up to<br>8000 hrs | Mid |
| Inovafitness/<br>SDS018 [164]                                | 59x45x20/-       | 4.7 to 5.3 | 70  | 4mA/laser<br>and fan<br>sleep/low<br>power<br>operating<br>mode | Laser sleep | 1/10   | UART,PWM/3.3V | FAN/same side     | service life is up to<br>8000 hrs | Mid |
| NanoSense/<br>PM2036 [163]                                   | 36x36x23.8/ 17.5 | 5          | 80  | 0.4mA                                                           | No          | 6/-    | I2C/3.3V      | FAN               | >1y                               | NA  |
| Panasonic/ LED<br>Type PM2.5 Sensor<br>[147]                 | 45x22x52/-       | 5          | 100 | NA                                                              | No          | 1/-    | I2C/-         | /same side        | NA                                | NA  |
| Panasonic/ SN-<br>GCJA5<br><br>Laser Type PM<br>Sensor [165] | 37x37x12/-       | 5          | 100 | NA                                                              | No          | 1/28   | I2C,UART/-    | FAN               | 5y                                | Mid |
| Plantower/ PMS<br>1003/ [80] [131]                           | 65x42x23/-       | 5 to 5.5   | 100 | <1mA/<br>adaptative<br>acquisition<br>frequency                 | No          | 1-10/- | UART/3.3V     | FAN/opposite side | MTTF ≥3y                          | Mid |



|                                                 |                   |            |     |                                                 |        |        |                                  |                   |                                                                                                                                                                                                                |      |
|-------------------------------------------------|-------------------|------------|-----|-------------------------------------------------|--------|--------|----------------------------------|-------------------|----------------------------------------------------------------------------------------------------------------------------------------------------------------------------------------------------------------|------|
| Plantower/ PMS 7003/ [55] [81] [82] [124] [129] | 48x37x12/-        | 5 to 5.5   | 100 | <1mA/<br>adaptative<br>acquisition<br>frequency | ON/OFF | 1-10/- | UART /3.3V                       | FAN/same side     | MTTF ≥3y                                                                                                                                                                                                       | Mid  |
| Plantower/ PMS A003/ [76] [125]                 | 35x38x12/-        | 5 to 5.5   | 100 | <1mA/<br>adaptative<br>acquisition<br>frequency | No     | 1-10/- | UART/3.3V                        | FAN/same side     | MTTF ≥3 Year                                                                                                                                                                                                   | Mid  |
| SAMYOUNG S&C/<br>PSML [148]                     | 59x45x17/25       | 5          | 85  | NA                                              | NA     | -/60   | LPO(Low Pulse<br>Occupancy)/ Vcc | Heater            | 5y min                                                                                                                                                                                                         | NA   |
| SAMYOUNG S&C/<br>PSMU [148]                     | 59x45x17/25       | 5          | 85  | NA                                              | NA     | -/60   | UART/-                           | Heater            | 5y min                                                                                                                                                                                                         | NA   |
| Sensirion/ SPS30/<br>[118] [132]                | 40.6x40.6x12.2/26 | 4.5 to 5.5 | 80  | <50μA/sleep<br>-mode -<br>idle-mode             | NA     | 1/30   | UART, I2C/-                      | FAN               | >10y/Maximum<br>long-term number<br>concentration<br>precision<br><br>limit drift2<br><br>0 to 1000 #/cm <sup>3</sup><br>±12.5 #/cm <sup>3</sup> / y<br><br>1000 to 3000 #/cm <sup>3</sup><br>±1.25 % m.v. / y | High |
| Sharp/<br>DN7C3CA007<br>[166]                   | 53x51x40/53       | 5          | 105 | NO                                              | EXT    | 0.01/- | Analog/3.4V                      | FAN/opposite side | 15000hour<br>MTTF/Laser<br>diode:50%<br>degradation/5 y                                                                                                                                                        | Mid  |

|                                                                     |                    |            |     |       |     |         |             |                                                  |                                           |     |
|---------------------------------------------------------------------|--------------------|------------|-----|-------|-----|---------|-------------|--------------------------------------------------|-------------------------------------------|-----|
| Sharp/<br>GP2Y1010AU0F/<br>[63] [65] [67] [83]<br>[134] [135] [136] | 46x30x17.6/16      | 5          | 40  | NO    | EXT | 0.001/- | Analog/-    | NO/opposite side                                 | Laser diode:50%<br>degradation/5<br>years | Low |
| Shinyei/ PMS1/ [93]<br>[137]                                        | 71.4x76.4x36.7/130 | 12         | 380 | NA    | NA  | NA      | Ethernet/-  | Heater                                           | NA                                        | NA  |
| Shinyei/ PPD20V/<br>[138] [139]                                     | 88x60x20/38        | 5          | 160 | NA    | No  | -/60    | PWM/-       | Heater                                           | 7y                                        | NA  |
| Shinyei/ PPD42NJ/<br>[63] [138] [140]                               | 59x45x22/24        | 5          | 90  | NA    | No  | -/60    | PWM/-       | Auto suction by a<br>built-in heater<br>resistor | 7y                                        | NA  |
| Shinyei/ PPD60PV-<br>T2/ [138] [141]                                | 88x60x22/-         | 5          | 140 | NA    | No  | -/60    | PWM/-       | Heater                                           | 3y                                        | NA  |
| Shinyei/ PPD71<br>[149]                                             | 34x30x28/-         | 5          | 100 | NA    | NA  | -/60    | UART/-      | Auto suction by a<br>built-in heater<br>resistor | 7y                                        | NA  |
| TianjinFigaro-<br>isweek/ TF-LP01<br>[167]                          | 51x33x22/-         | 5          | 100 | NA    | NA  | 10/-    | UART, PWM/- | FAN                                              | NA                                        | Mid |
| Winsen/<br>ZH03/ZH03A/ZH0<br>3B/ [67] [82] [142]                    | 50x32.4x21/-       | 5          | 120 | <10mA | NA  | -/45    | PWM/-       | FAN/opposite site                                | 3y in the air                             | Mid |
| Winsen/ ZH06- I<br>[168]                                            | 47x37x12.2/-       | 4.9 to 5.5 | 120 | <20mA | NA  | -/45    | UART, PWM/- | FAN/same side                                    | NA                                        | Low |

|                                            |                 |   |     |      |    |       |            |        |    |     |
|--------------------------------------------|-----------------|---|-----|------|----|-------|------------|--------|----|-----|
| Winsen/ ZPH01<br>[150]                     | 59.47×44.5×20/- | 5 | 150 | NA   | NA | -/300 | PWM,UART/- | Heater | NA | Low |
| YAGUCHI<br>ELECTRIC CORP./<br>SDS021 [169] | 42.5×32×24.5/-  | 5 | 70  | 10mA | No | 1/-   | UART,PWM/- | FAN    | NA | NA  |
